# Supplementary material
Source: Springer Nature journal article supplement (https://www.springermedizin.de/resource/supplementary/12876_2007_242_MOESM3_ESM.pdf/9439108)

GATA-4

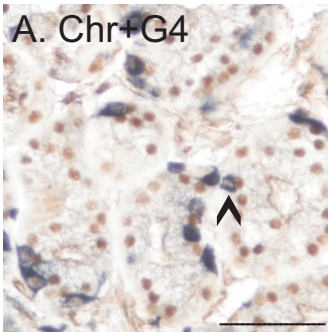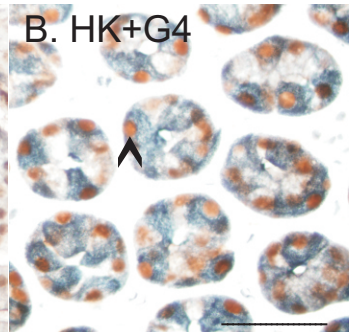

GATA-6

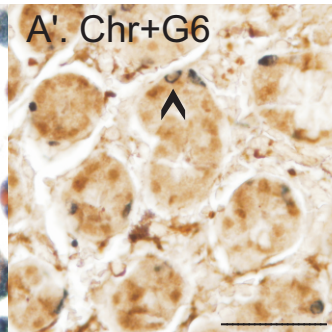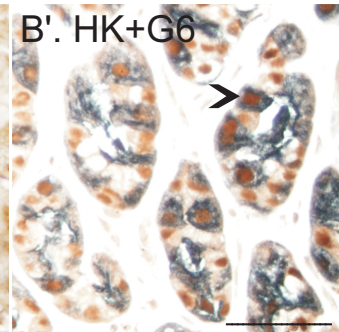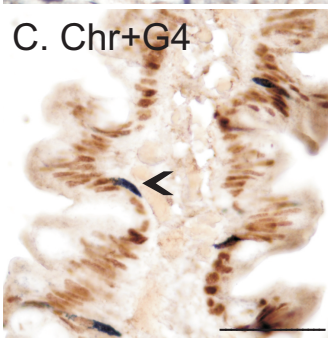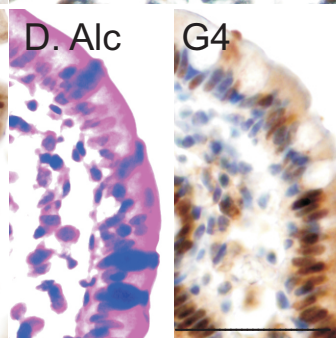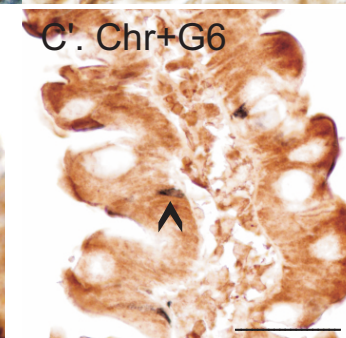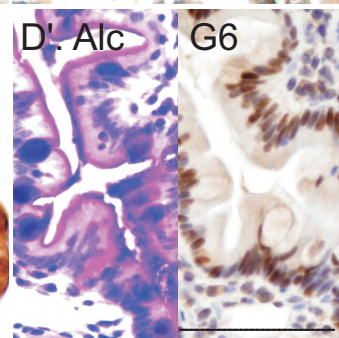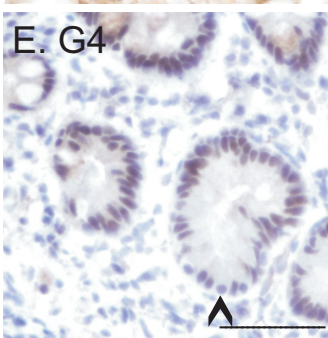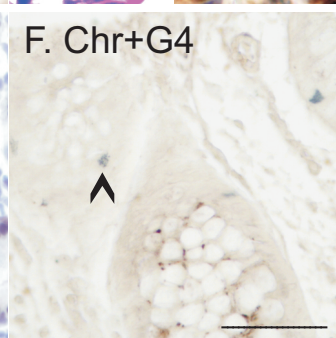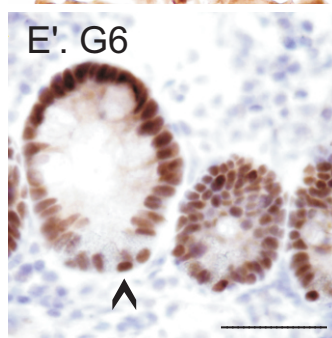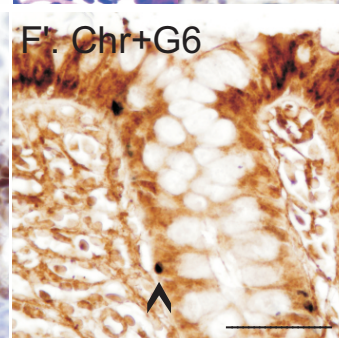

Supplement: MOESM3 [file 9439108]
